# Supplementary material
Source: publisher figshare collection journal article supplement (https://brill.figshare.com/articles/dataset/_/3759483)

# EUROPEAN EXTERNAL ACTION SERVICE

Graphic presentation

01 June 2015

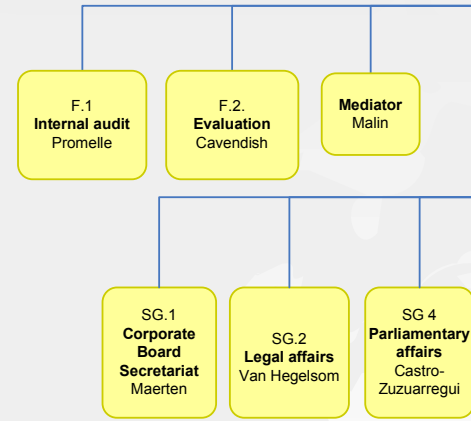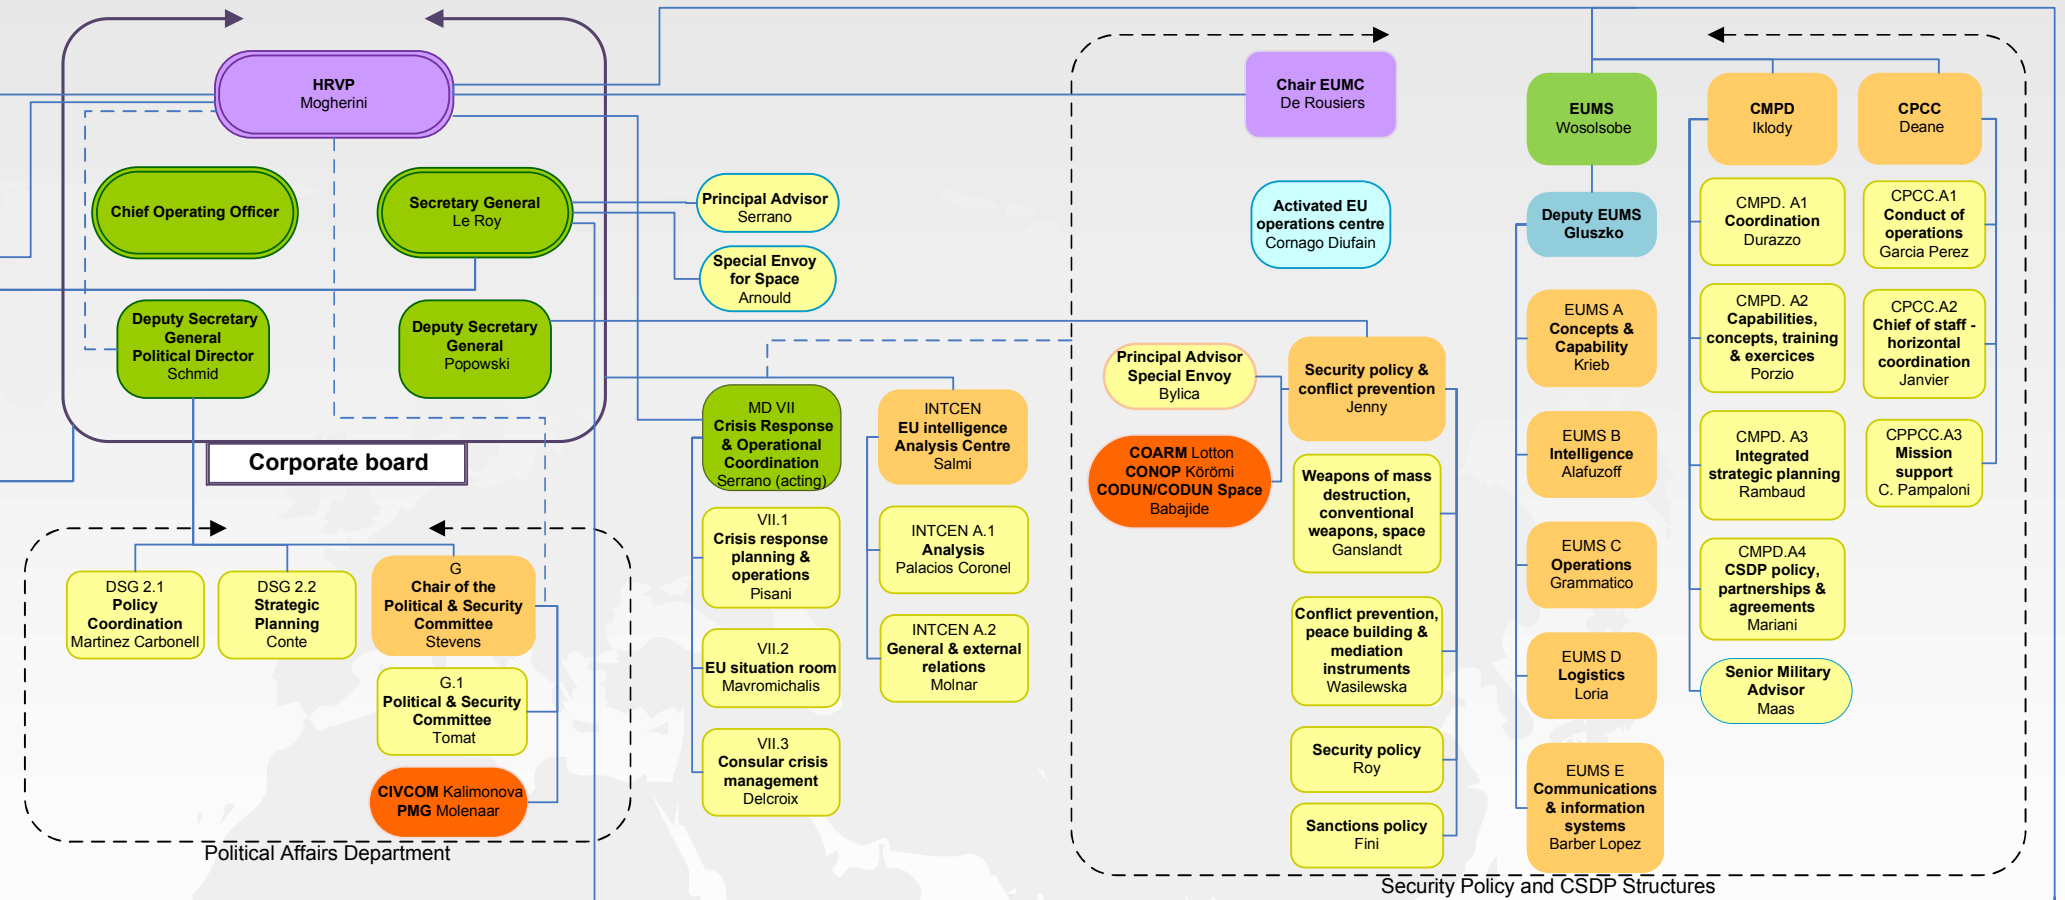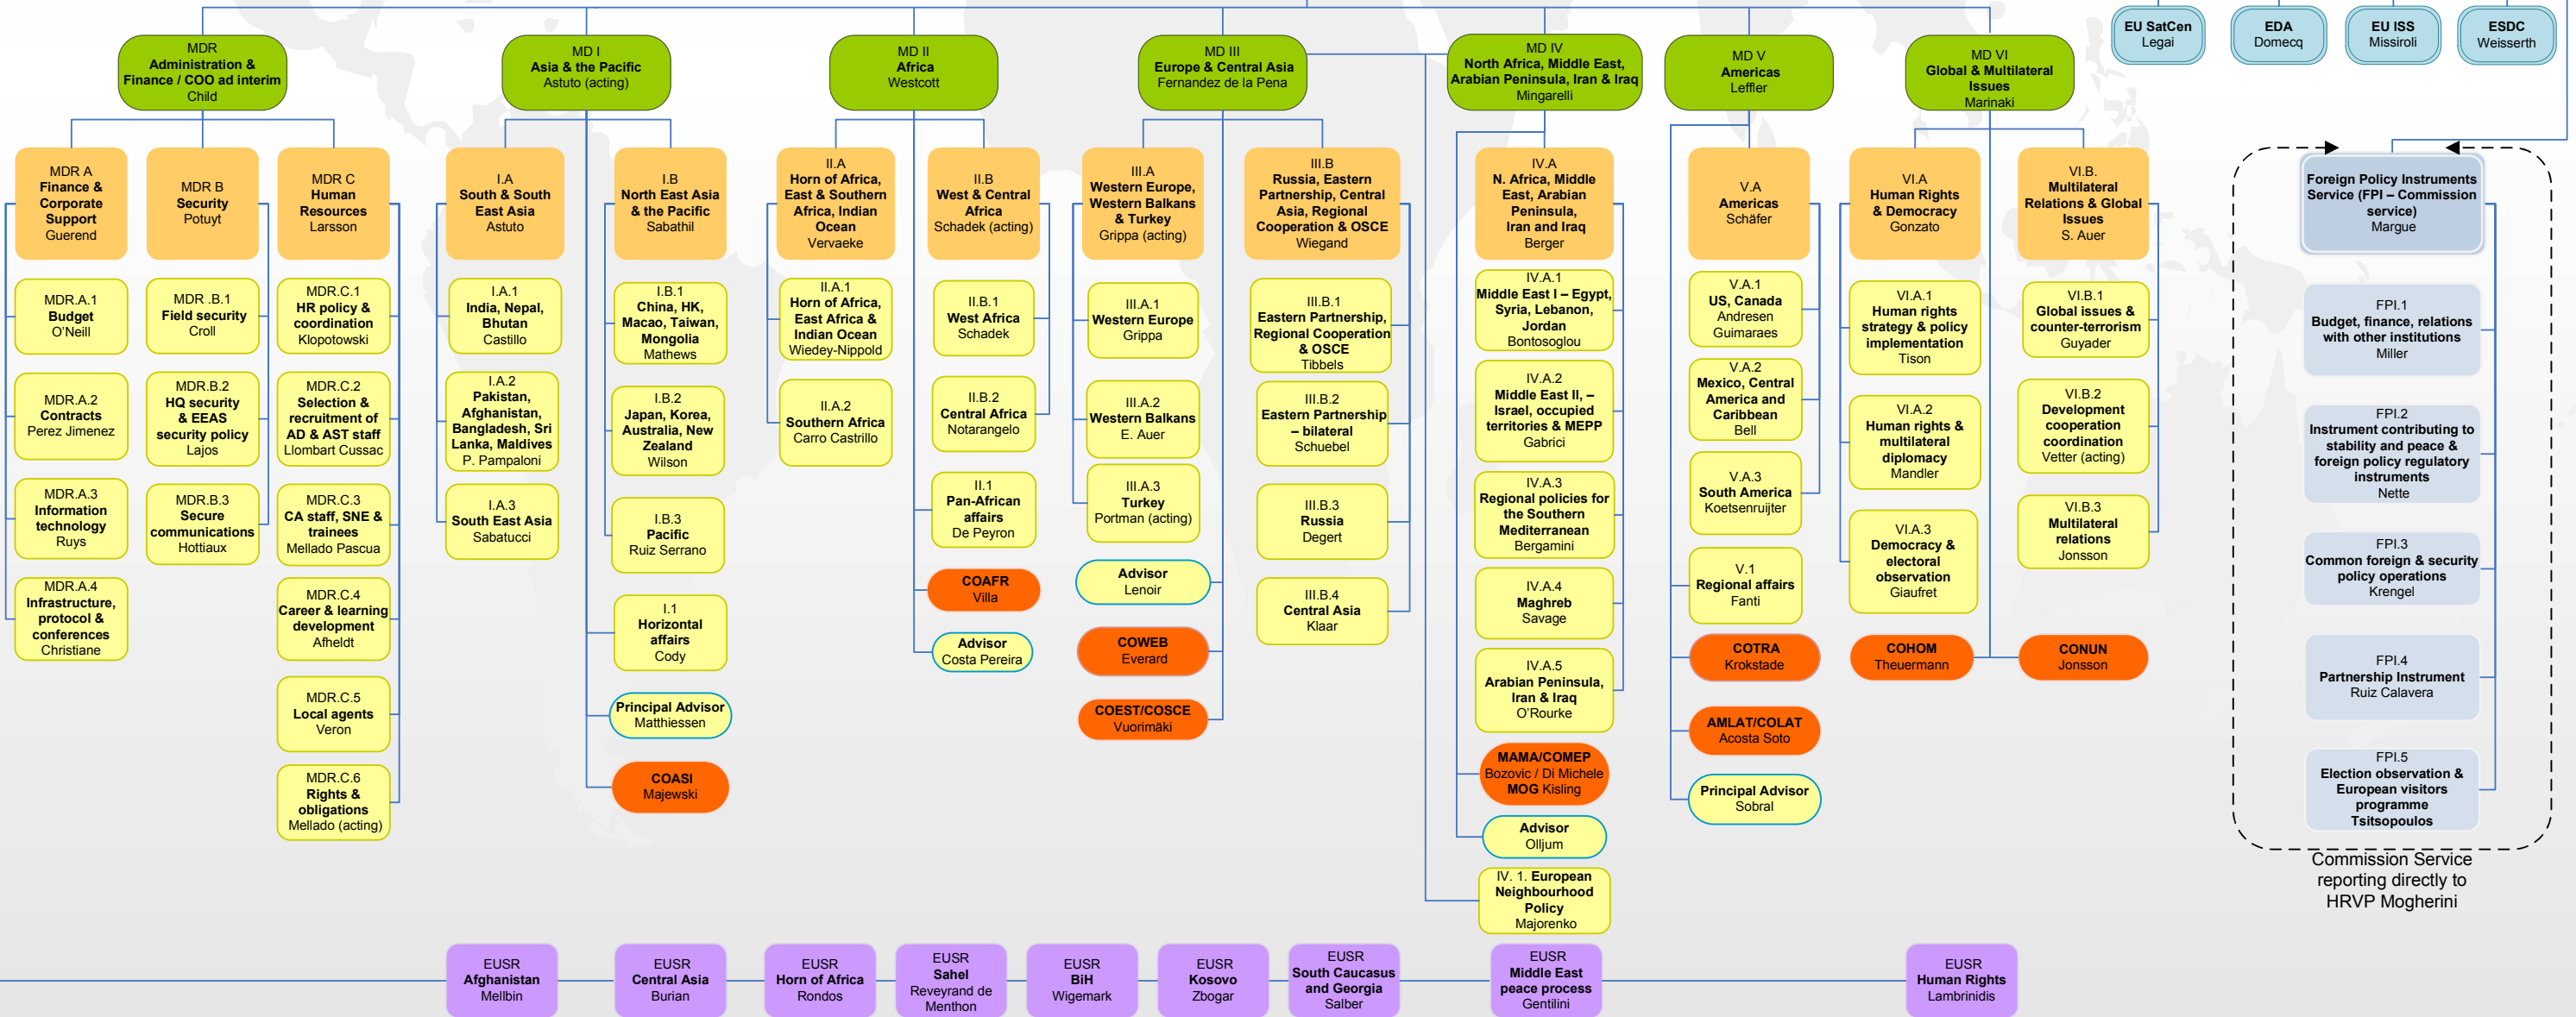

Supplement: Supplementary file 1 [file 1]

EUROPEAN EXTERNAL ACTION SERVICE  
Organisation chart

Draft as of 31 August 2015

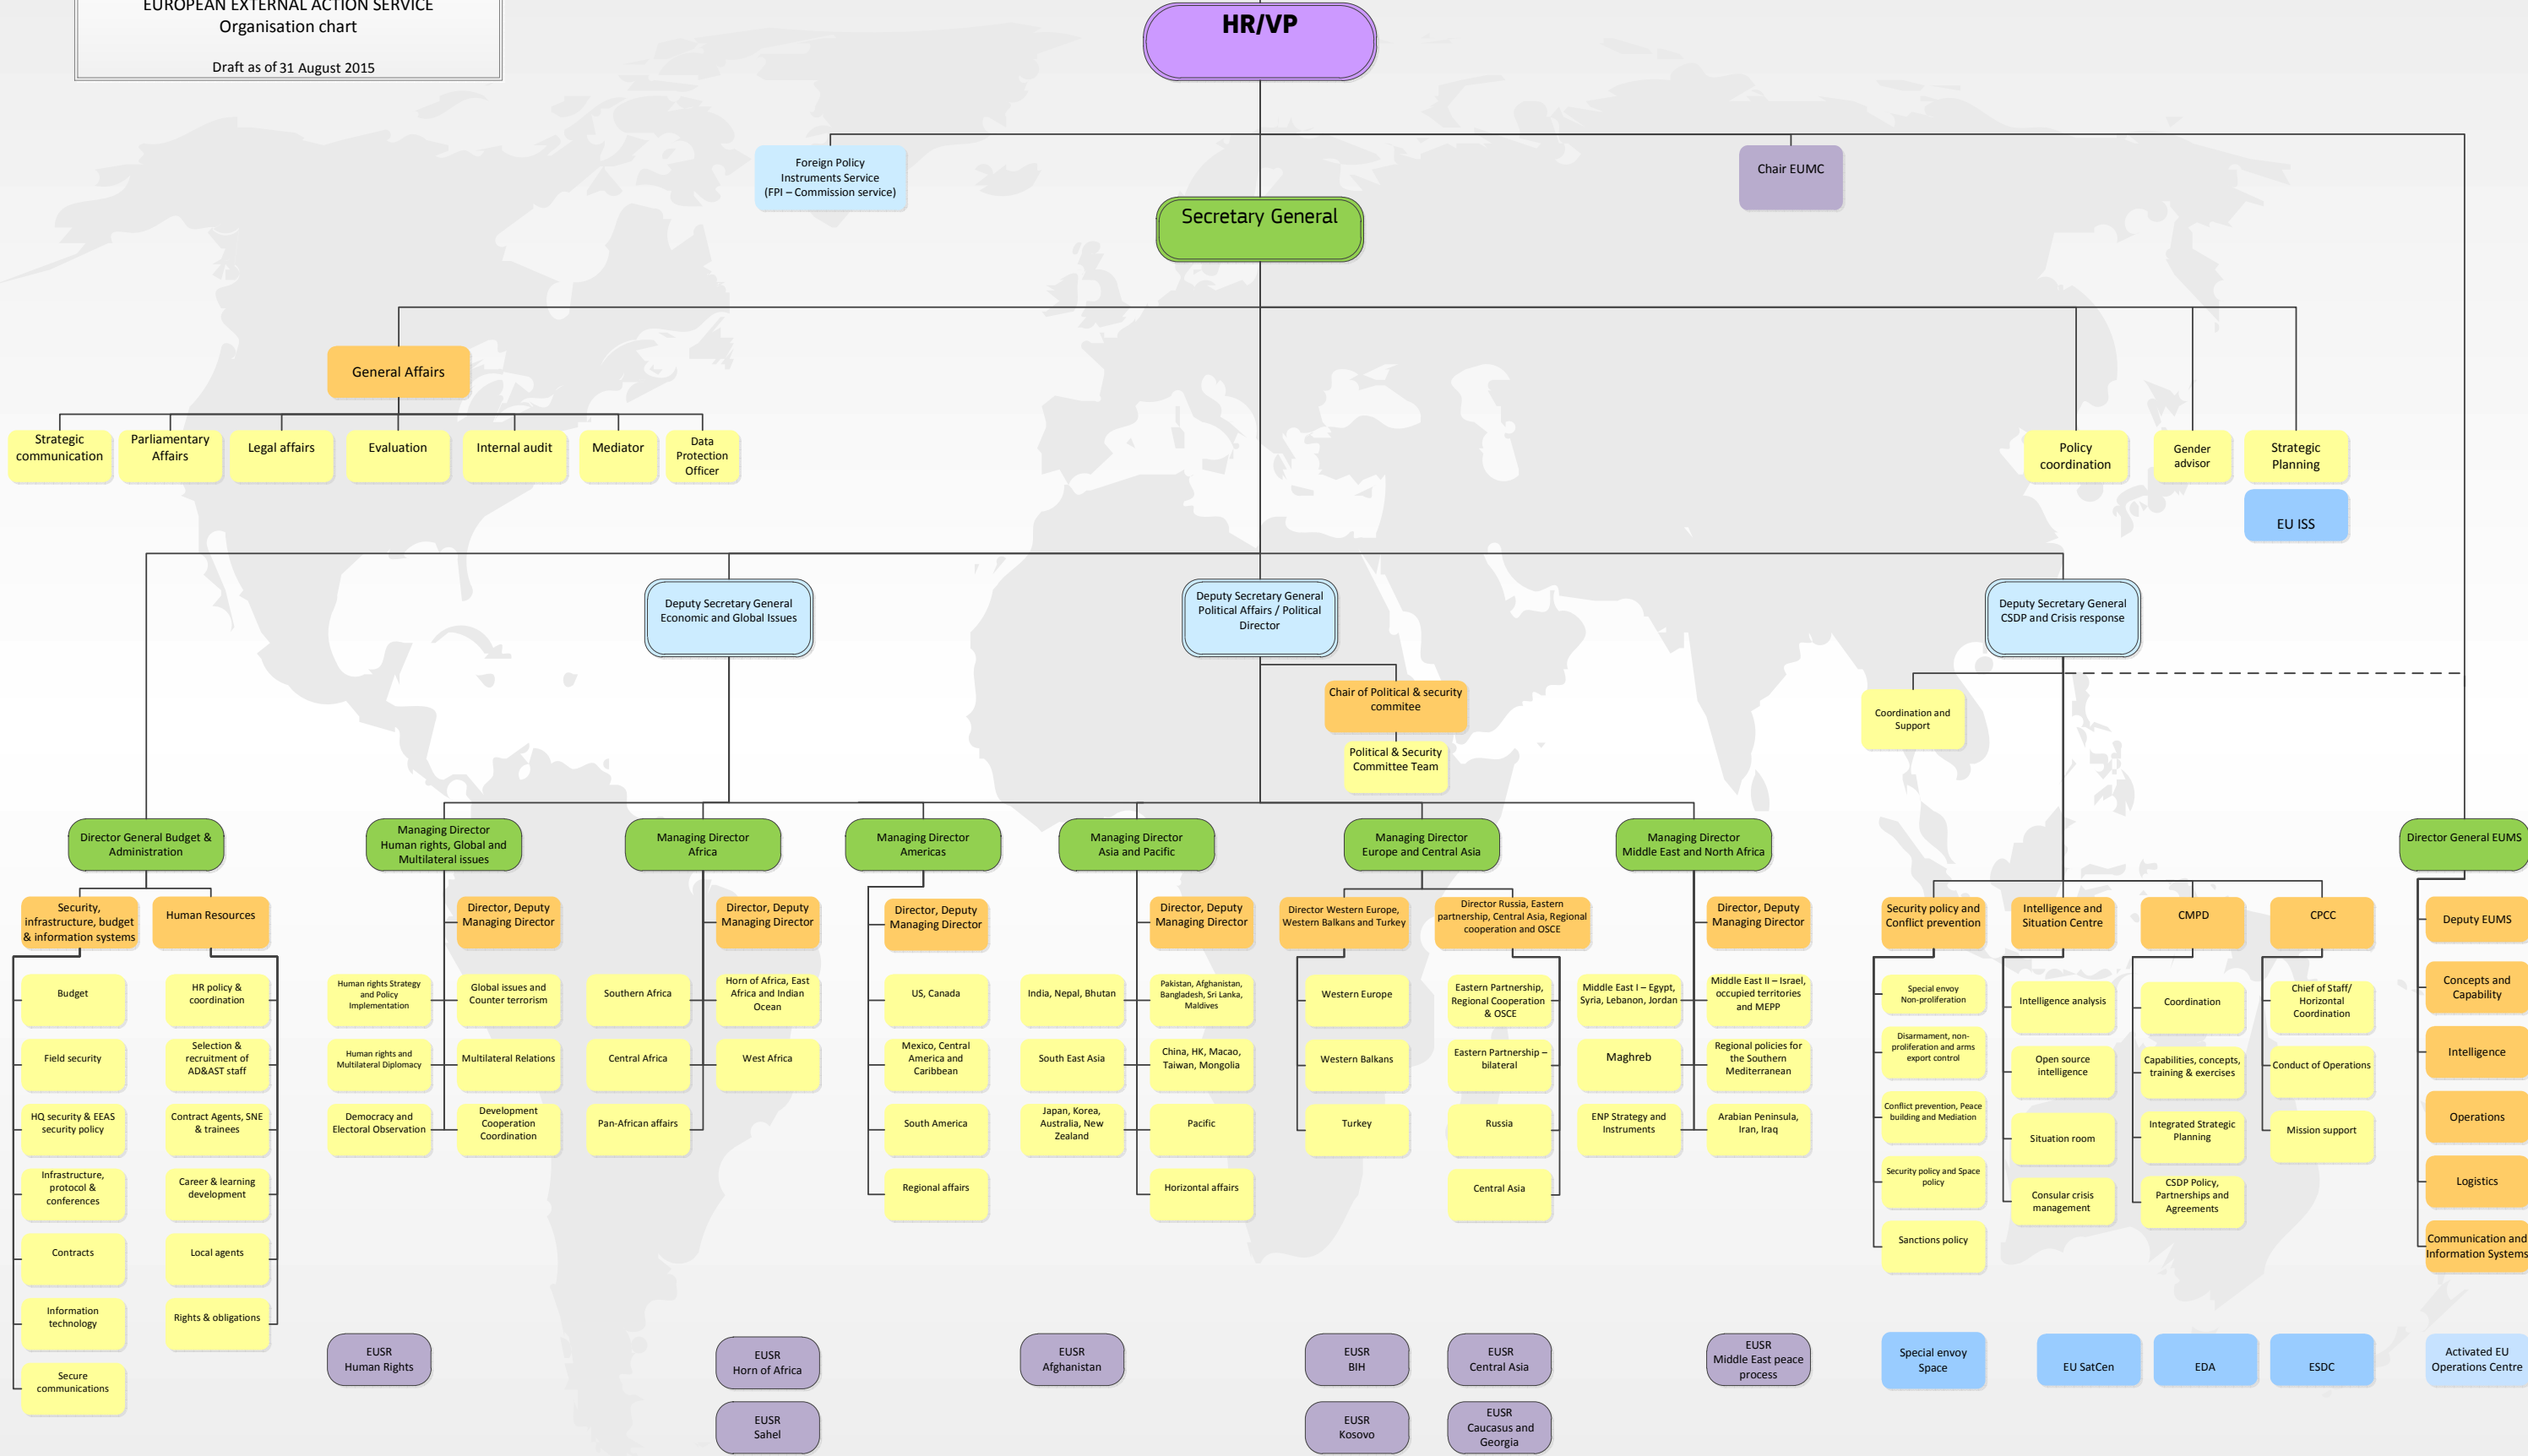

Supplement: Supplementary file 2 [file 1]
